# Supplementary material
Source: PubMed Central journal article supplement (PMC3277729)
Supplement: Supp_Data.pdf [file Supp_Data.pdf]

## SUPPLEMENTARY DATA

**Supplementary Table S1. RTK Ligands and Cytokines Used to Test the Specificity of Induction of A549-EGFRB Cells**

| Ligand               | Main target                   | Tested concentrations (nM) |     |     | Provider      | Catalog no. |
|----------------------|-------------------------------|----------------------------|-----|-----|---------------|-------------|
|                      |                               | D1                         | D2  | D3  |               |             |
| EGF                  | ErbB1                         | 5                          | 50  | 500 | Sigma-Aldrich | E-9644      |
| TGF- $\alpha$        | ErbB1                         | 5                          | 50  | 500 | Sigma-Aldrich | T7924       |
| TNF- $\alpha$        | TNFR                          | 5                          | 50  | 250 | Sigma-Aldrich | H8916       |
| Heregulin- $\beta$ 1 | ErbB3 and 4                   | 1                          | 5   | 25  | Thermo Fisher | RP318POA    |
| PDGF                 | PDGFR- $\alpha$ and - $\beta$ | 1                          | 2.5 | 10  | Sigma-Aldrich | P8147       |
| IGF                  | IGF1R                         | 5                          | 50  | 500 | Sigma-Aldrich | I3769       |

EGF, epidermal growth factor; IGF, insulin-like growth factor; PDGF, platelet-derived growth factor; TGF- $\alpha$ , transforming growth factor  $\alpha$ ; TNF- $\alpha$ , tumor necrosis factor  $\alpha$ .

**Supplementary Table S2. Chemical Structures and the Commercial Source of the 26 Compounds in the Panel**

|                    |                                | Structure |                    |                                           | Structure |
|--------------------|--------------------------------|-----------|--------------------|-------------------------------------------|-----------|
| Compound name      | PD 153035 <sup>20</sup>        |           | Compound name      | Imatinib <sup>25</sup>                    |           |
| Target/specificity | EGFR inhibitor                 |           | Target/specificity | Abl and PDGFR- $\beta$ inhibitor          |           |
| Supplier           | Biaffin GmbH                   |           | Supplier           | LC Laboratories                           |           |
| Compound name      | Gefitinib <sup>24</sup>        |           | Compound name      | Vatalanib <sup>26</sup>                   |           |
| Target/specificity | EGFR inhibitor                 |           | Target/specificity | VEGFR inhibitor                           |           |
| Supplier           | LC Laboratories                |           | Supplier           | LC Laboratories                           |           |
| Compound name      | Erbstatin analog <sup>16</sup> |           | Compound name      | DMPQ <sup>27</sup>                        |           |
| Target/specificity | EGFR inhibitor                 |           | Target/specificity | PDGFR inhibitor                           |           |
| Supplier           | Biaffin GmbH                   |           | Supplier           | LC Laboratories                           |           |
| Compound name      | Lavendustin A <sup>17</sup>    |           | Compound name      | SU 4312 <sup>28</sup>                     |           |
| Target/specificity | EGFR inhibitor                 |           | Target/specificity | VEGFR and PDGFR tyrosine kinase inhibitor |           |
| Supplier           | Biaffin GmbH                   |           | Supplier           | Biaffin GmbH                              |           |
| Compound name      | Gö 6976 <sup>29</sup>          |           | Compound name      | Midostaurin, PKC412 <sup>30</sup>         |           |
| Target/specificity | PKC inhibitor                  |           | Target/specificity | PKC inhibitor                             |           |
| Supplier           | LC Laboratories                |           | Supplier           | LC Laboratories                           |           |

(continued)

**Supplementary Table S2. (Continued)**

|                    |                                                                                    | Structure |                    |                           | Structure |
|--------------------|------------------------------------------------------------------------------------|-----------|--------------------|---------------------------|-----------|
| Compound name      | Apigenin <sup>31</sup>                                                             |           | Compound name      | SL327 <sup>32</sup>       |           |
| Target/specificity | Broad kinase inhibitor                                                             |           | Target/specificity | MEK1 and MEK2 inhibitor   |           |
| Supplier           | Biaffin GmbH                                                                       |           | Supplier           | Biaffin GmbH              |           |
| Compound name      | 3-(2-Aminoethyl)-5-((4-ethoxyphenyl)methylene)-2,4-thiazolidinedione <sup>33</sup> |           | Compound name      | PD 169316 <sup>34</sup>   |           |
| Target/specificity | ERK inhibitor                                                                      |           | Target/specificity | p38 kinase inhibitor      |           |
| Supplier           | Biaffin GmbH                                                                       |           | Supplier           | Biaffin GmbH              |           |
| Compound name      | Temsirolimus <sup>35</sup>                                                         |           | Compound name      | L-685,458 <sup>36</sup>   |           |
| Target/specificity | mTOR inhibitor                                                                     |           | Target/specificity | γ-secretase inhibitor     |           |
| Supplier           | LC Laboratories                                                                    |           | Supplier           | Sigma                     |           |
| Compound name      | Rutilantinone <sup>37</sup>                                                        |           | Compound name      | Ellipticine <sup>38</sup> |           |
| Target/specificity | Antibiotic                                                                         |           | Target/specificity | CYP1A1 inhibitor          |           |
| Supplier           | Microsource                                                                        |           | Supplier           | Prestwick chemicals       |           |
| Compound name      | Adaphostin <sup>39</sup>                                                           |           | Compound name      | Lycorine <sup>43</sup>    |           |
| Target/specificity | Bcr-Abl inhibitor                                                                  |           | Target/specificity | Toxic compound            |           |
| Supplier           | Biaffin GmbH                                                                       |           | Supplier           | Microsource               |           |
| Compound name      | Phloretin <sup>40</sup>                                                            |           | Compound name      | Wortmannin <sup>44</sup>  |           |
| Target/specificity | Ca channel blocker, K channel activator                                            |           | Target/specificity | PI3K inhibitor            |           |
| Supplier           | Biaffin GmbH                                                                       |           | Supplier           | LC Laboratories           |           |
| Compound name      | Dasatinib <sup>41</sup>                                                            |           | Compound name      | Quinacrine <sup>45</sup>  |           |
| Target/specificity | Bcr-Abl and Src inhibitor                                                          |           | Target/specificity | Antimalarial drug         |           |
| Supplier           | LC Laboratories                                                                    |           | Supplier           | Prestwick Chemicals       |           |
| Compound name      | Calyculin A <sup>42</sup>                                                          |           | Compound name      | Sunitinib <sup>46</sup>   |           |
| Target/specificity | Serine/threonine phosphatase inhibitor                                             |           | Target/specificity | Broad RTK inhibitor       |           |
| Supplier           | LC Laboratories                                                                    |           | Supplier           | LC Laboratories           |           |

EGFR, epidermal growth factor receptor; MEK, MAP/ERK kinase; PDGFR, platelet-derived growth factor receptor; PI3K, phosphatidylinositol-3-kinase; PKC, protein kinase C; RTK, receptor tyrosine kinase; VEGFR, vascular endothelial growth factor receptor.
